# Supplementary material
Source: PubMed Central journal article supplement (PMC5033842)
Supplement: jciinsight-1-86055-s001.pdf [file jciinsight-1-86055-s001.pdf]

## SUPPLEMENTAL DATA:

### MATERIALS AND METHODS:

**Transgenic animals and metabolic studies.** Experiments were conducted on male 6 and 9 month-old *Il1r1*-deficient mice (B6.129S7-*Il1r1*<sup>tm1Imx</sup>/J) and their wild-type and heterozygous littermates. Strain information, genotypes, glucose tolerance, and insulin tolerance tests described in main text.

**Electrophysiology.** Experiments were performed on untreated dispersed mouse islets using electrophysiological solutions and protocols described in main text.

**[Ca<sup>2+</sup>]<sub>i</sub> measurements.** Experiments were performed on untreated intact mouse islets using solutions and protocols described in main text.

**Actin Staining.** Dispersed mouse islets were plated onto untreated coverslips. Cells were pre-incubated with 2.8 mmol/L Krebs-Ringer Bicarbonate (KRB) solution for 2 hours prior to a 2-minute treatment with latrunculin B (Sigma-Aldrich, Oakville, ON; 10 μmol/l) or a 15-minute treatment with 2.8 or 16.7 mmol/l glucose-KRB, as indicated. Solution components, sample preparation, imaging, and analysis as described in main text.

**Electron Microscopy.** Experiments were performed on untreated intact mouse islets using solutions, protocols, and analysis software described in main text.

**Insulin secretion assay.** Measurements were performed at 37°C in KRB. Islet perfusion was performed at a flow rate of 100 μl/min. Islets were perfused with 2.8 mmol/l glucose for 30 minutes (as a pre-incubation step) and then with glucose and/or recombinant human IL-1β (Sigma-Aldrich, Oakville, ON; 10 ng/ml), as indicated. Solution components, sample storage, and insulin measurements described in main text.

## Supplemental Figure 1:

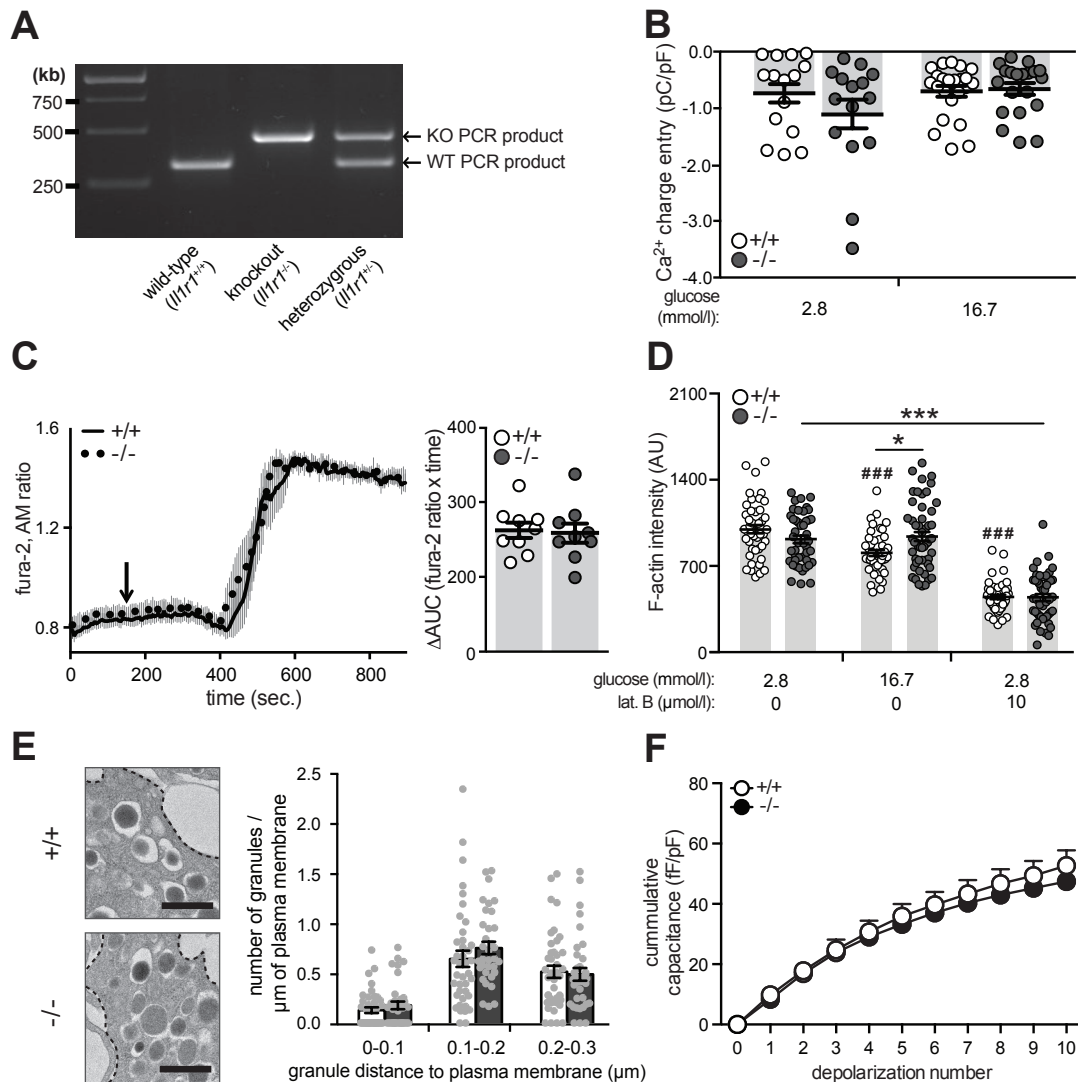

### *Il1r1*-deficiency impairs filamentous-actin dynamics in pancreatic $\beta$ -cells.

**A:** Representative PCR-based genotyping using genomic DNA (from ear notches) of mice with indicated genotypes.

**B:** Quantification of responses following a single depolarization from -70 to 0 mV in dispersed mouse  $\beta$ -cells from wild-type (*+/+*) or *Il1r1*-knockout (*-/-*) mice in the presence of either 2.8 or 16.7 mmol/l glucose ( $n=16, 15, 23, 20; 3$  experiments).

**C:** Responses in intracellular Ca<sup>2+</sup> concentrations ([Ca<sup>2+</sup>]<sub>i</sub>) from wild-type (*+/+*) or *Il1r1*-knockout (*-/-*) islets following glucose-stimulation (arrow; *left*) and change in area under the curve ( $\Delta$ AUC) of [Ca<sup>2+</sup>]<sub>i</sub> responses (*right*) ( $n=9, 9; 3$  experiments).

**D:** Quantification of average peak filamentous-actin (F-actin) intensities of dispersed  $\beta$ -cells from wild-type (*+/+*) or *Il1r1*-knockout (*-/-*) mice treated with 2.8 or 16.7 mmol/l (10 minutes) glucose or latrunculin B (lat. B; 10  $\mu$ mol/l; 2 minutes) ( $n=45, 45, 46, 53, 45, 47; 3$  experiments). Data were compared using 2-way ANOVA with Tukey post-test. \* $P<0.05$ , \*\*\* $P<0.005$  versus 2.8 mmol/l wild-type control; \* $P<0.05$ , \*\*\* $P<0.005$  as indicated.

**E:** Representative electron micrographs of mouse  $\beta$ -cells from wild-type (*+/+*) or *Il1r1*-knockout (*-/-*) mice (*left*), and quantification of the number of granules per micron of plasma membrane (*right*). Experiments were performed in 2.8 mmol/l glucose. Black dashed line indicates plasma membrane. ( $n=40, 35, 40, 35, 41, 35; 3$  experiments). Scale bar represents 500 nm.

**F:** Exocytotic responses from single wild-type (*+/+*) or *Il1r1*-knockout (*-/-*) mouse  $\beta$ -cells measured as an increase in cell membrane capacitance, during a train of membrane depolarizations from -70 to 0 mV in 16.7 mmol/l glucose ( $n=32, 35; 3$  experiments).

## Supplemental Figure 2:

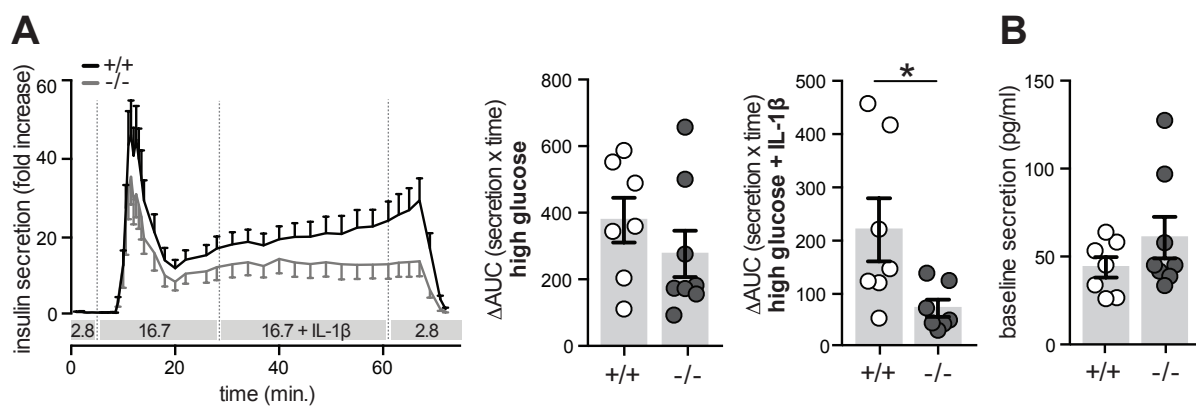

### *Il1r1*-deficiency has a minor effect on glucose-stimulated insulin secretion.

**A:** Insulin secretion normalized to fold increase over baseline at low glucose from wild-type (+/+) or *Il1r1*-knockout (-/-) islets exposed to 2.8 or 16.7 mmol/l glucose and treated with IL-1 $\beta$  (10 ng/ml), as indicated (*left*) ( $n=7, 8$  mice). Change in area under the curve ( $\Delta$ AUC) of the response to high glucose (*middle*) ( $n=7, 7$  mice) and to high glucose and IL-1 $\beta$  (*right*) ( $n=7, 8$  mice) are shown. Data were compared using a two-tailed Student's *t*-test. \* $P<0.05$  as indicated.

**B:** Average insulin secretion during 2.8 mmol/l glucose baseline from wild-type (+/+) or *Il1r1*-knockout (-/-) islets ( $n=7, 8$  mice).

**Supplemental Table 1:**

| <b>Donor</b> | <b>Age (years)</b> | <b>Sex</b> | <b>BMI (kg/m<sup>2</sup>)</b> | <b>HbA<sub>1c</sub> (%)</b> | <b>IL-1<math>\beta</math> Index</b> | <b>Type 2 Diabetic</b> |
|--------------|--------------------|------------|-------------------------------|-----------------------------|-------------------------------------|------------------------|
| <b>H1744</b> | 56                 | n/a        | 16.7                          | 5.9                         | 1.27                                | -                      |
| <b>H1732</b> | 61                 | male       | 27.5                          | 5.5                         | 1.47                                | -                      |
| <b>H1919</b> | n/a                | n/a        | 26.7                          | 5.9                         | 1.73                                | -                      |
| <b>R066</b>  | 44                 | male       | 32.2                          | n/a                         | 2.33                                | -                      |
| <b>R067</b>  | 60                 | male       | 26.0                          | 5.5                         | 1.09                                | -                      |
| <b>R072</b>  | 54                 | female     | 30.8                          | 6.2                         | 1.95                                | -                      |
| <b>R073</b>  | 74                 | female     | 28.3                          | 5.4                         | 1.81                                | -                      |
| <b>R140</b>  | 49                 | female     | 22.0                          | 5.6                         | 1.03                                | -                      |
| <b>R141</b>  | 56                 | female     | 33.2                          | 5.5                         | 0.99                                | yes                    |
| <b>R142</b>  | 63                 | female     | 25.3                          | 4.9                         | 1.80                                | -                      |
| <b>R150</b>  | 42                 | male       | 31.7                          | 5.9                         | 1.49                                | -                      |
| <b>R151</b>  | 46                 | female     | 26.7                          | 5.4                         | 1.51                                | -                      |
| <b>R152</b>  | 54                 | female     | 42.6                          | 8.3                         | 1.19                                | yes                    |
| <b>R154</b>  | 57                 | female     | 40.9                          | 7.2                         | 1.10                                | yes                    |
| <b>R157</b>  | 60                 | female     | 23.3                          | 6.0                         | 0.85                                | -                      |
| <b>R159</b>  | 60                 | male       | 30.4                          | 5.5                         | 1.68                                | -                      |
| <b>R160</b>  | 27                 | male       | 25.4                          | 5.7                         | 0.83                                | -                      |

**Human islet donor information.**

Individual characteristics of human donors assessed in Figure 1C-E. HbA<sub>1c</sub>: glycated hemoglobin. IL-1 $\beta$  Index: IL-1 $\beta$  potentiation index, defined as the ratio of insulin secretion induced by 16.7 mmol/l glucose in the presence of IL-1 $\beta$  to the insulin secretion induced by 16.7 mmol/l glucose alone.

**Supplemental Table 2:**

|                                                                   | <b>Age<br/>(years)</b> | <b>BMI<br/>(kg/m<sup>2</sup>)</b> | <b>HbA<sub>1c</sub><br/>(%)</b> | <b>IL-1<math>\beta</math> Index</b> |
|-------------------------------------------------------------------|------------------------|-----------------------------------|---------------------------------|-------------------------------------|
| <b>lean</b> [<25 kg/m <sup>2</sup> ]:<br>average<br>SEM           | 55.0<br>± 3.21         | 20.7<br>± 2.02                    | 5.8<br>± 0.12                   | 1.05<br>± 0.122                     |
| <b>overweight</b> [25 – 30 kg/m <sup>2</sup> ]:<br>average<br>SEM | 55.2<br>± 6.71         | 26.6<br>± 0.414                   | 5.5<br>± 0.12                   | 1.46<br>± 0.142                     |
| <b>obese</b> [>30 kg/m <sup>2</sup> ]:<br>average<br>SEM          | 50.0<br>± 4.24         | 31.3<br>± 0.411                   | 5.9<br>± 0.20                   | 1.86<br>± 0.182                     |
| <b>obese, T2D</b> [>30 kg/m <sup>2</sup> ]:<br>average<br>SEM     | 55.7<br>± 0.882        | 38.9<br>± 2.89                    | 7.0<br>± 0.81                   | 1.09<br>± 0.058                     |

**Summary characteristics of human islet donors.**

Mean characteristics of human donors studied in Figure 1C-E, according to BMI tertiles as indicated. HbA<sub>1c</sub>: glycated hemoglobin. T2D: type 2 diabetic. IL-1 $\beta$  Index: IL-1 $\beta$  potentiation index, defined as the ratio of insulin secretion induced by 16.7 mmol/l glucose in the presence of IL-1 $\beta$  to the insulin secretion induced by 16.7 mmol/l glucose alone.

### Supplemental Figure 3:

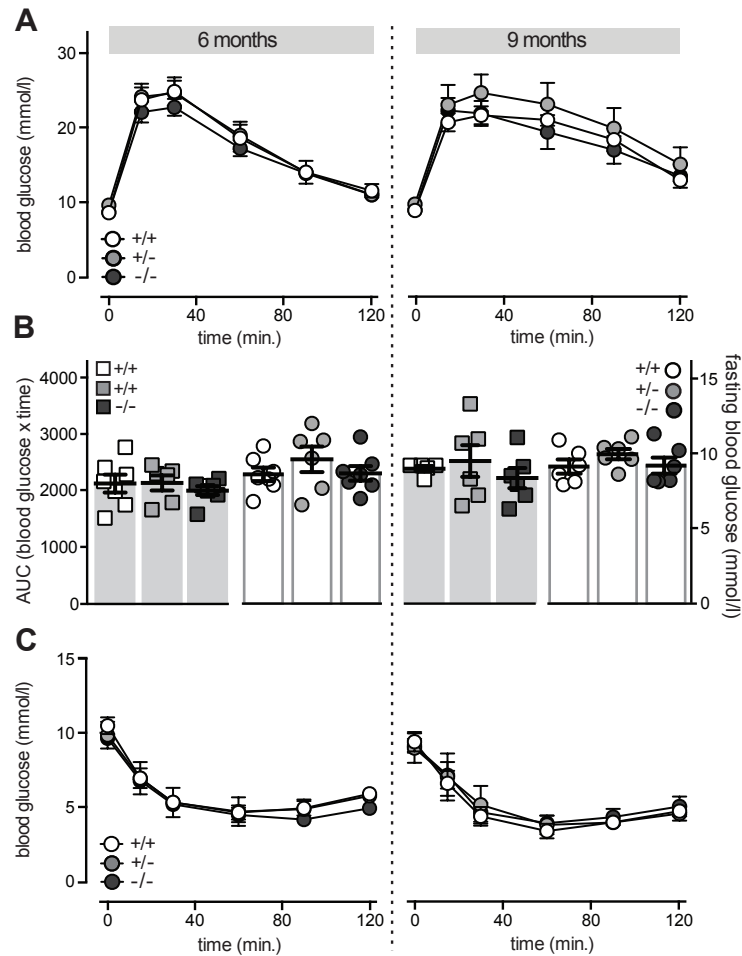

#### ***I1r1*-deficient mice have normal glucose tolerance.**

**A:** Blood glucose measurements following intraperitoneal glucose injection of 6 and 9 month wild-type (+/+), heterozygous (+/-), and *I1r1*-knockout (-/-) mice ( $n=7, 6, 7; n=6, 6, 6$  mice) following a 3-hour fast.

**B:** Area under the curve (AUC) for glucose tolerance tests in **(A)**, indicated by squares ( $n=7, 6, 7; n=5, 6, 6$ ) and fasting blood glucose concentrations following a 3-hour fast, indicated by circles ( $n=7, 6, 7; n=6, 6, 6$  mice).

**C:** Blood glucose measurements following intraperitoneal insulin injections from wild-type (+/+), heterozygous (+/-), and *I1r1*-knockout mice (-/-) ( $n=6, 5, 6; n=7, 7, 8$  mice) following a 3-hour fast.
